# Supplementary material
Source: PubMed Central journal article supplement (PMC3769326)
Supplement: supp_M113.027532_mcp.M113.027532-1.pdf [file supp_M113.027532_mcp.M113.027532-1.pdf]

Table S6. *Septoria tritici* proteins and phosphosites identified from infected wheat cvs. Stakado and Sevin

| Accession <sup>a)</sup> | Protein and phosphopeptides                                 | SignalP | Stakado <sup>c)</sup> | Sevin <sup>c)</sup> |
|-------------------------|-------------------------------------------------------------|---------|-----------------------|---------------------|
| 110785                  | Chaperonin 60                                               | N       | N                     | Y                   |
| 102837                  | H <sup>+</sup> -transporting two-sector ATPase              | N       | N                     | Y                   |
| 105948                  | Actin                                                       | N       | Y                     | N                   |
| 65997                   | Adenine nucleotide translocator 1                           | Y       | Y                     | Y                   |
| 48386                   | Zn-finger, C2H2 type and FYVE type                          | Y       | N                     | Y                   |
| 55760                   | Elongation factor                                           | N       | Y                     | N                   |
| 92705                   | Elongation factor Tu                                        | N       | Y                     | Y                   |
| 102848                  | Ribosomal protein L3                                        | Y       | N                     | Y                   |
| 99159                   | Ribosomal protein S11                                       | N       | Y                     | N                   |
| 64524                   | Transcription elongation factor                             | N       | Y                     | Y                   |
| 74526                   | Helicase                                                    | N       | Y                     | Y                   |
| 36977                   | Helicase                                                    | N       | N                     | Y                   |
| 106181                  | Histone H2A                                                 | N       | Y                     | N                   |
| 106182                  | Histone H2B                                                 | N       | Y                     | Y                   |
| 101387                  | Glycosyl transferase                                        | N       | Y                     | N                   |
| 55968                   | Triosephosphate isomerase                                   | N       | N                     | Y                   |
| 98270                   | Isocitrate/isopropylmalate dehydrogenase                    | N       | Y                     | N                   |
| 19110                   | Ubiquitin                                                   | N       | Y                     | Y                   |
| 102072                  | 14-3-3 protein                                              | N       | Y                     | Y                   |
| 110139                  | 14-3-3 protein                                              | N       | Y                     | Y                   |
| 78786                   | GTP-binding protein SAR1                                    | Y       | Y                     | N                   |
| 28304                   | Ras GTPase                                                  | N       | Y                     | N                   |
| 102943                  | Ras GTPase                                                  | N       | Y                     | Y                   |
| 98343                   | Ras GTPase                                                  | N       | Y                     | Y                   |
| 99493                   | Ras GTPase                                                  | N       | Y                     | N                   |
| 76357                   | Sec7 like protein                                           | N       | Y                     | Y                   |
| 99564                   | Calcium-binding EF-hand                                     | N       | Y                     | N                   |
| 104579                  | Calcium-binding EF-hand                                     | N       | N                     | Y                   |
| 91945                   | Hypothetical protein                                        | N       | N                     | Y                   |
| 97681                   | Hypothetical protein                                        | N       | N                     | Y                   |
| 43052                   | Hypothetical protein                                        | N       | Y                     | N                   |
| 99758 <sup>b)</sup>     | Cell division/GTP binding protein (EHTPSSQPVGGDDDEpSVGGAQH) | Y       | N                     | Y                   |
| 25855 <sup>b)</sup>     | Tetratrico peptide repeat (KVEEEGAGADEpSDDDAAPATR)          | N       | N                     | Y                   |
| 59052 <sup>b)</sup>     | H <sup>+</sup> -transporting ATPase (KWpSQAPGNIEDLDEYALQK)  | N       | N                     | Y                   |
| 106779 <sup>b)</sup>    | Glycoside hydrolase family 5 (QTLAAIpTK)                    | Y       | N                     | Y                   |
| 18811 <sup>b)</sup>     | Hypothetical protein (RTpSpSpTVpSGVFNILDLEK)                | N       | N                     | Y                   |

a) Accession number n DOE Joint Genome Institute gene index for *Septoria tritici*

b) Phosphosites identified in five proteins. Lower case p indicates phosphorylation of Ser or Thr that follows.

c) Y: Yes; N:No. Proteins were identified in one or both cultivars.
