# Supplementary material
Source: PubMed Central journal article supplement (PMC3769326)
Supplement: supp_M113.027532_mcp.M113.027532-4.pdf [file supp_M113.027532_mcp.M113.027532-4.pdf]

Table S1. Primer sequences for qRT-PCR analysis of fungal genes

| Gene                                                            | Accession no           | Primer | Sequence (5' → 3')    |
|-----------------------------------------------------------------|------------------------|--------|-----------------------|
| Mitogen-activated protein kinase (Slk2)                         | DQ062121 <sup>a)</sup> | F      | GTCGACCAGCTGAACCAGAT  |
|                                                                 |                        | R      | GGTIGCGAACGTATTCCTGT  |
| Mitogen-activated protein kinase (Fus3)                         | AY877346 <sup>a)</sup> | F      | GCCCTTTGATCACTCCATGT  |
|                                                                 |                        | R      | ATTTGGGCTTTTGGATGTCA  |
| Mitogen-activated protein kinase (Hog1)                         | DQ432031 <sup>a)</sup> | F      | TCTCTCCAAGCGAACCTACC  |
|                                                                 |                        | R      | CGAAATGAAGATGTCGCTGA  |
| G-protein $\alpha$ subunit ( <i>G<math>\alpha</math>3</i> )     | DQ458051 <sup>a)</sup> | F      | TCAGAAGAAGCGCAGTCAG   |
|                                                                 |                        | R      | CGCCAGACCCTAGCAGTAG   |
| Protein kinase A ( <i>Tpk2</i> )                                | DQ432033 <sup>a)</sup> | F      | AGGGCAAATACACGCTGAA   |
|                                                                 |                        | R      | GACCGCGTAGAATCGTGAA   |
| ABC transporter ( <i>Atr4</i> )                                 | AF329852 <sup>a)</sup> | F      | TAAGAAGTCCTCCGGCTTCA  |
|                                                                 |                        | R      | CGGGTCTTCGTTCGTGTAT   |
| Cu <sup>2+</sup> /Zn <sup>2+</sup> - Superoxide dismutase (SOD) | 103593 <sup>b)</sup>   | F      | GGTCCTCACTCAACCCCTCA  |
|                                                                 |                        | R      | CGGTCTTAAAGTTGCCCAAG  |
| $\alpha$ -L-arabinofuranosidase (ABF)                           | 68922 <sup>b)</sup>    | F      | GTCGCCCTCAAAGACTTCAC  |
|                                                                 |                        | R      | GCGAACATCATGGAGCTGT   |
| 1,4- $\beta$ -xylanase                                          | 94846 <sup>b)</sup>    | F      | TCTTGCGACGAAGAGATGTG  |
|                                                                 |                        | R      | CGGGAAAGGTACCAGGAAT   |
| $\beta$ -glucosidase                                            | 99970 <sup>b)</sup>    | F      | GCTTTATCTTTGGCCATTTCG |
|                                                                 |                        | R      | AGGAGGTAGTTCAGCGCGT   |
| Elongation factor                                               | 92705 <sup>b)</sup>    | F      | GTCAGGTCGGTGCTGGATAC  |
|                                                                 |                        | R      | GTACGGCGATCGATCTTCTC  |

a) Accession numbers in NCBI

b) Accession numbers in DOE Joint Genome Institute gene index for *Septoria tritici*
