# Supplementary material
Source: PubMed Central journal article supplement (PMC3769326)
Supplement: supp_M113.027532_mcp.M113.027532-7.pdf [file supp_M113.027532_mcp.M113.027532-7.pdf]

Table S4. Proteins differentially expressed in wheat in response to *Septoria tritici*

| Accession                                            | Protein                                        | Ratio infected/control |       |       |         |       |       |
|------------------------------------------------------|------------------------------------------------|------------------------|-------|-------|---------|-------|-------|
|                                                      |                                                | Sevin                  |       |       | Stakado |       |       |
|                                                      |                                                | 3 dai                  | 7 dai | 11dai | 3 dai   | 7 dai | 11dai |
| <b>Primary metabolic process</b>                     |                                                |                        |       |       |         |       |       |
| TC371037                                             | Enoyl-ACP reductase precursor                  |                        |       |       |         | 0.68  |       |
| TC379727                                             | Fructose-bisphosphate aldolase                 |                        |       |       |         | 0.7   |       |
| TC412122                                             | Glyceraldehyde-3-phosphate dehydrogenase A     |                        |       |       | 0.57    |       |       |
| TC442232                                             | Vacuolar H <sup>+</sup> -pyrophosphatase       |                        |       |       |         |       | 0.67  |
| CA617715                                             | H(+)-transporting ATP synthase                 |                        |       | 1.5   |         |       |       |
| CV772230                                             | Aspartate aminotransferase                     | 1.51                   |       |       |         |       |       |
| TC371952                                             | Fructose-bisphosphate aldolase                 | 0.7                    |       |       |         |       |       |
| TC400250                                             | Orthophosphate dikinase precursor              | 1.62                   |       |       |         |       |       |
| TC424680                                             | Succinyl-CoA ligase subunit alpha-2            |                        | 1.56  |       |         |       |       |
| BE213642                                             | Llight-harvesting chlorophyll a/b bind protein |                        |       |       |         | 0.66  |       |
| CA616742                                             | Chloroplast pigment-binding protein CP24       |                        |       |       |         | 0.6   |       |
| CA617100                                             | Photosystem I reaction center subunit IV       |                        |       |       |         | 0.44  |       |
| CA654848                                             | Plastocyanin                                   |                        |       |       | 0.7     |       |       |
| CK212284                                             | Chloroplast chlorophyll a-b binding protein    |                        |       |       | 0.53    |       |       |
| CK213988                                             | Type III chlorophyll a/b-binding protein       |                        |       |       |         | 0.67  |       |
| CK216586                                             | Oxygen-evolving complex                        |                        |       |       |         | 0.7   |       |
| CV777028                                             | Ribulose bisphosphate carboxylase large chain  |                        |       |       | 0.41    |       |       |
| TC370314                                             | Cytochrome b6-f complex iron-sulfur subunit    |                        |       |       |         | 0.7   |       |
| TC379054                                             | Chloroplast oxygen-evolving enhancer protein 1 |                        |       |       |         | 0.55  |       |
| TC392459                                             | Ribulose bisphosphate carboxylase small chain  |                        |       |       |         | 0.67  |       |
| TC415751                                             | Chlorophyll a/b-binding protein WCAB           |                        |       |       |         | 0.7   |       |
| TC442786                                             | Ribulose bisphosphate carboxylase small chain  |                        |       |       |         | 0.7   | 0.48  |
| TC432780                                             | Chlorophyll a/b-binding protein CP29 precursor | 0.7                    |       |       |         | 0.62  |       |
| BE418417                                             | Photosystem I reaction center subunit VI       | 0.55                   |       |       |         |       |       |
| TC379050                                             | Ribulose bisphosphate carboxylase small chain  | 0.57                   |       |       |         |       |       |
| TC394991                                             | Chlorophyll a-b binding protein                |                        | 0.7   |       |         |       |       |
| TC445151                                             | Ribulose bisphosphate carboxylase large chain  | 0.67                   | 0.7   | 0.66  |         |       |       |
| <b>Secondary and macromolecule metabolic process</b> |                                                |                        |       |       |         |       |       |
| BG275008                                             | Histone H2A.6                                  |                        |       |       | 0.55    |       |       |
| CK160145                                             | Acyl carrier protein 1                         |                        |       |       |         | 0.7   |       |
| CD865903                                             | Xylanase inhibitor precursor                   | 1.75                   | 1.73  |       | 1.61    | 2.03  |       |
| CA486222                                             | Cinnamyl alcohol dehydrogenase                 |                        |       | 2.27  |         |       |       |
| CA690555                                             | Histone H2B.3                                  | 1.57                   |       |       |         |       |       |
| TC393439                                             | Beta-glucosidase precursor                     |                        |       | 0.62  |         |       |       |
| <b>Translation</b>                                   |                                                |                        |       |       |         |       |       |
| CJ932623                                             | Chloroplast 50S ribosomal protein L31          |                        |       |       | 7.43    | 0.64  | 51.19 |
| TC374082                                             | 60S ribosomal protein L1                       |                        |       |       | 1.67    |       |       |
| TC369235                                             | Chloroplast 30S ribosomal protein S3           |                        |       | 0.62  |         |       |       |
| TC374724                                             | 50S ribosomal protein L12-1                    | 0.7                    |       |       |         |       |       |
| TC378147                                             | Elongation factor Tu                           |                        |       | 0.69  |         |       |       |
| TC444138                                             | Chloroplast 30S ribosomal protein S4           |                        | 0.7   |       |         |       |       |
| <b>Proteolysis</b>                                   |                                                |                        |       |       |         |       |       |
| TC403883                                             | Cell division protease ftsH                    |                        |       |       |         | 0.7   |       |
| CA665316                                             | Latex-abundant protein                         |                        |       | 0.7   |         |       |       |
| TC393527                                             | Zinc dependent protease                        |                        |       | 3.43  |         |       |       |
| <b>Protein folding</b>                               |                                                |                        |       |       |         |       |       |
| BQ904143                                             | Thylakoid lumenal 20 kDa protein               |                        |       |       | 1.5     |       | 1.87  |
| TC377400                                             | Heat shock protein                             |                        |       |       |         | 0.69  |       |
| TC382873                                             | Chloroplast heat shock protein 70              |                        |       |       | 0.67    |       |       |
| TC387198                                             | Putative chaperonin 21                         |                        |       |       |         |       | 1.5   |
| TC397344                                             | Endoplasmic homolog precursor                  |                        |       |       |         |       | 1.62  |
| TC402551                                             | Chaperonin 21                                  |                        |       |       | 26.02   |       |       |
| TC398641                                             | Heat shock protein 80                          |                        |       | 1.54  |         | 1.5   |       |
| TC372032                                             | Heat shock protein 70                          |                        |       | 1.84  |         |       |       |
| TC384247                                             | Endoplasmic homolog precursor                  |                        |       | 1.55  |         |       |       |
| <b>Response to stress</b>                            |                                                |                        |       |       |         |       |       |

|                              |                                              |      |      |      |      |
|------------------------------|----------------------------------------------|------|------|------|------|
| TC368669                     | Beta-1,3-glucanase                           |      |      | 1.5  | 1.5  |
| CA609262                     | Peroxidase precursor                         |      |      |      | 1.61 |
| TC372232                     | Peroxidase precursor                         |      |      |      | 1.69 |
| BE418361                     | Cold-responsive LEA/RAB-related COR protein  |      |      | 0.65 |      |
| CA622365                     | Cold acclimation protein WCOR615             |      |      | 0.68 |      |
| CA601190                     | Pore-forming toxin-like protein Hfr-2        |      |      |      | 0.64 |
| TC371340                     | Pore-forming toxin-like protein Hfr-2        |      |      | 1.59 |      |
| TC416447                     | Lipoxygenase                                 |      |      |      | 0.68 |
| TC417881                     | Carbonic anhydrase                           |      |      | 1.56 |      |
| CV760145                     | Glucan endo-1,3-beta-D-glucanase             | 1.53 | 2.49 |      |      |
| TC407335                     | Glucan endo-1,3-beta-D-glucanase             |      | 1.7  |      |      |
| TC387062                     | Chitinase                                    |      | 1.78 |      |      |
| CV768616                     | Pathogenesis-related protein 1               |      | 2.34 |      |      |
| CA624157                     | Disease resistance response protein          | 1.87 |      |      |      |
| CA682817                     | Catalase                                     |      | 1.5  |      |      |
| TC381980                     | Catalase isozyme 2                           | 1.58 | 1.58 |      |      |
| TC372152                     | Cationic peroxidase SPC4 precursor           |      | 1.82 |      |      |
| TC376136                     | Peroxidase 3                                 |      | 1.5  |      |      |
| TC397003                     | Peroxiredoxin-2E-2                           | 1.68 |      |      |      |
| TC405025                     | L-ascorbate peroxidase chloroplast precursor |      | 0.67 |      |      |
| CK162321                     | Lipoxygenase                                 |      | 0.67 |      |      |
| CK206567                     | Light-induced protein 1-like                 |      | 0.58 |      |      |
| CK215604                     | Salt stress root protein RS1                 |      | 0.7  |      |      |
| TC371259                     | Mitochondrial lipoamide dehydrogenase        |      | 1.5  |      |      |
| TC375080                     | Cold-responsive LEA/RAB-related COR protein  |      | 0.7  |      |      |
| TC401882                     | Plastid-lipid-associated protein             |      | 1.77 |      |      |
| <b>Biological regulation</b> |                                              |      |      |      |      |
| BE426325                     | Chloroplast RNA-binding protein              |      |      | 1.66 |      |
| TC437198                     | HEXBP DNA binding protein                    |      |      |      | 1.5  |
| CA639866                     | BTF3b-like transcription factor              |      | 1.58 |      |      |
| CK204674                     | GDP-dissociation inhibitor                   | 1.57 |      |      |      |
| AL821986                     | ARF-like small GTPase-like protein           |      | 1.5  |      |      |
| <b>Transport</b>             |                                              |      |      |      |      |
| CA625882                     | Amino acid selective channel protein         |      |      | 2.01 | 2.45 |
| CA639565                     | Cytochrome c oxidase subunit Vb              |      |      | 0.7  |      |
| BE591717                     | 2-oxoglutarate/malate translocator           | 1.52 |      |      |      |
| <b>Unknown</b>               |                                              |      |      |      |      |
| TC395661                     | Putative uncharacterized protein             |      |      | 3.38 | 1.71 |
| TC408598                     | Putative uncharacterized protein             |      |      | 1.5  |      |
| BE426561                     | Putative uncharacterized protein             |      | 6.1  |      |      |
| CA596451                     | Putative uncharacterized protein             | 0.53 |      |      |      |
| TC378834                     | Chromosome chr18 scaffold_61                 |      | 1.59 |      |      |

The present ratios were calculated by TMT-127/TMT-126 for 3 dai, TMT-129/TMT-128 for 7 dai, TMT-131/TMT-130 for 11 dai from at least two biological replications. Proteins with ratio above 1.5 are up-regulated and ratio below 0.7 are down-regulated. Proteins marked in red were identified in both wheat cultivars Sevin and Stakado. Accession numbers are from TaGI wheat gene index Release 12.0.
