# Supplementary material
Source: PubMed Central journal article supplement (PMC3769326)
Supplement: supp_M113.027532_mcp.M113.027532-8.pdf [file supp_M113.027532_mcp.M113.027532-8.pdf]

Table S5. Phosphopeptides showing significant changes in wheat after infection by *Septoria tritici*

| Sequence                     | Accession | Protein                                                | Ratio infected/control |       |       |         |       |       |
|------------------------------|-----------|--------------------------------------------------------|------------------------|-------|-------|---------|-------|-------|
|                              |           |                                                        | Sevin                  |       |       | Stakado |       |       |
|                              |           |                                                        | 3 dai                  | 7 dai | 11dai | 3 dai   | 7 dai | 11dai |
| <b>Signaling process</b>     |           |                                                        |                        |       |       |         |       |       |
| DEHDEDpTDEDEEEEEEEK          | BJ275521  | Ankyrin repeat domain protein 17 isoform 1             | 15.06                  | 50.01 |       |         | 1.66  |       |
| ITAAQVLEHPWLHDpSK            | DR741624  | Calcium-dependent protein kinase 7                     | 12.86                  |       | 1.59  |         | 1.89  | 1.64  |
| pSQESVGLTGDGTGK              | TC457254  | Protein kinase NPH1-1                                  | 1.54                   | 50.53 | 0.44  |         |       |       |
| SAATAWGSPSDApSDAEGDAGHGR     | CV762209  | Pherophorin-C1 protein                                 |                        |       |       | 0.31    | 1.80  | 0.62  |
| FLTASGpTFK                   | CA694214  | Protein kinase ZmMEK1                                  |                        |       |       | 0.41    |       |       |
| HVDApSDDDDVVK                | BG604433  | Pleckstrin homology domain containing protein          |                        |       |       |         |       | 1.90  |
| IAPLPDTEGpSAPGHVSTVVK        | TC410926  | Receptor-like kinase                                   |                        |       |       |         |       | 2.81  |
| RApSLSGAAALGAGALQK           | TC439304  | RPT2-like protein                                      | 0.54                   |       | 0.58  |         |       |       |
| VEDLWEVAQPQLpSPSEK           | TC370389  | SNF1-related protein kinase regulatory subunit gamma 1 | 5.98                   |       |       |         |       |       |
| SDpSVVIDEVELQQHQR            | CA660480  | Src homology-3 domain protein 3                        |                        |       |       | 0.65    | 0.60  |       |
| TPpSFSELNEILLGQEHLK          | TC449684  | DENN (AEX-3) domain-containing protein-like            | 0.62                   |       | 0.65  |         |       |       |
| <b>Transport</b>             |           |                                                        |                        |       |       |         |       |       |
| KPPEDTpSPPIVGEGLVIDEWK       | CA736971  | 27 k vesicle-associated membrane protein               | 9.42                   |       |       |         | 1.52  |       |
| SFIIEpSDDDDDEEDPAHR          | BQ241431  | Amino acid transporter                                 |                        |       |       | 0.18    | 0.52  |       |
| pYSEHQPIGTAAQGGGADEK         | CA692290  | PIP1;3 protein                                         | 9.20                   | 34.88 |       | 0.64    |       |       |
| pTLHGLQAPEPASHTLFNDK         | BJ227308  | Plasma membrane ATPase                                 |                        |       | 2.07  | 0.42    |       |       |
| LGSSApSFGR                   | TC385048  | Plasma membrane intrinsic protein                      |                        |       | 1.75  |         |       |       |
| EIAAPHGpSIMGVGR              | TC423348  | Sugar transporter                                      |                        | 0.56  |       |         |       |       |
| GGGQSALGSALGLMpSR            | TC423348  | Sugar transporter                                      |                        | 34.04 | 34.03 |         | 1.90  |       |
| GGGQSALGpSALGLMSR            | TC423348  | Sugar transporter                                      |                        |       |       |         | 1.73  | 22.72 |
| GGGQSALGpSALGLMpSR           | TC423348  | Sugar transporter                                      |                        |       |       |         | 2.24  |       |
| GGGQpSALGSALGLMpSR           | TC423348  | Sugar transporter                                      |                        |       |       |         | 2.07  |       |
| GGGQSALGpSALGLmSR            | TC423348  | Sugar transporter                                      |                        | 0.59  |       |         |       |       |
| GGGQpSALGpSALGLMSR           | TC423348  | Sugar transporter                                      | 0.28                   | 0.56  |       |         |       |       |
| STLFPNFGpSMFVAEQQQAQ         | TC423348  | Sugar transporter                                      |                        |       |       | 2.28    |       |       |
| STLFPNFGSMFpSVAEQQQAQ        | TC423348  | Sugar transporter                                      | 1.50                   |       | 2.19  |         |       |       |
| QMQAGMSSMpSFk                | TC371555  | TOM (Target of myb1)-like protein                      |                        |       |       |         | 1.85  | 0.35  |
| RpPSGIQQLLAAEQEAQQIVNAAR     | CA594105  | Vacuolar ATPase subunit G                              |                        |       |       |         | 0.33  | 1.73  |
| <b>Biological regulation</b> |           |                                                        |                        |       |       |         |       |       |
| EEGEIpSESEEQIK               | TC403079  | Chromodomain-helicase-DNA-binding protein              |                        |       |       |         |       | 1.68  |
| GGGDTSFSTpSLPVLPEK           | TC389520  | Acute myeloid leukemia protein 1-like                  |                        | 0.53  |       |         |       |       |

|                                  |          |                                                  |       |       |       |      |      |       |
|----------------------------------|----------|--------------------------------------------------|-------|-------|-------|------|------|-------|
| EAApSPAPADGSAPAK                 | TC389456 | HMG-I/Y protein HMGa-like                        | 0.54  | 0.68  |       |      |      |       |
| KVEADSTINPpTPPPVEVK              | TC390629 | Methyl binding domain protein MBD109             |       | 0.50  |       |      | 1.85 |       |
| QEDAEDAEEpSGDHADAEEAK            | TC390629 | Methyl binding domain protein MBD109             |       | 33.99 | 0.50  |      | 1.69 |       |
| DEDDpSGGEEEEEGEEHEK              | TC370869 | Alfalfa zinc finger protein-like                 | 3.51  | 50.83 |       |      |      | 1.54  |
| YDNDNDGHpSPR                     | CJ656504 | Alfalfa zinc finger protein-like                 |       |       |       |      |      | 1.98  |
| pSPNATPAK                        | TC378754 | BRI1-KD interacting protein 105                  |       | 0.68  |       |      |      |       |
| EEAEApSEMEQEASGK                 | TC408268 | BRI1-KD interacting protein 135                  |       |       |       |      |      | 1.74  |
| AIEAAGGpSPR                      | TC454885 | WRKY35-like protein                              |       |       |       |      |      | 1.53  |
| GEEDGDGpSDVGDGAPPAAPHR           | BG908374 | ZF-HD homeobox protein                           |       |       |       | 3.48 | 0.38 |       |
| ANpSSSLPNsYGGGGR                 | CK201783 | Alternative splicing regulator                   |       | 1.57  | 0.61  |      |      |       |
| IWQYGDVEpSDEEDQAPGGR             | CK163910 | RNA binding protein Rp120                        |       |       |       | 0.58 | 3.29 | 9.46  |
| HGGEDpSDEPEEEPEEQIEVEGDGDGDGR    | TC397506 | RNA recognition motif family protein             |       |       |       |      | 4.72 | 7.27  |
| ALQESLNTEpSPPR                   | TC384395 | LIM domain-containing protein                    | 4.52  | 50.55 | 50.72 |      |      |       |
| INFPSAASSLQDLSATGNpSPLHPSAGR     | TC440813 | Arm repeat-containing protein                    |       |       |       |      |      | 1.74  |
| <b>Protein folding</b>           |          |                                                  |       |       |       |      |      |       |
| AkpTLDVPHAlDISK                  | TC381714 | Calmodulin-binding heat-shock protein            |       | 0.68  |       |      |      |       |
| ElpSDEDEDEK                      | GD186640 | Heat shock protein 80                            |       |       |       |      | 3.03 | 10.02 |
| ElpSDEDEEEK                      | CA671116 | Heat shock protein 90                            |       |       |       |      | 1.78 | 3.78  |
| EPEHDPENDDpSPEDENEEDFDNR         | CJ933354 | Peptidyl-prolyl cis-trans isomerase              |       |       |       |      | 4.98 | 4.19  |
| <b>Response to stress</b>        |          |                                                  |       |       |       |      |      |       |
| VDALHSGGIGVVAPPpSPSQR            | TC429879 | Dehydration responsive element-binding protein 1 | 1.78  | 3.40  | 34.10 |      |      |       |
| FYDEPQGYGMHAGPpSPPR              | TC458788 | LigA                                             |       |       |       |      | 4.67 |       |
| RAPpSGGADAIGQMFQGPpELWTK         | CK198030 | Stress-induced protein sti1                      |       |       | 2.43  |      |      |       |
| IAASQAAVAAlQPSpSPR               | CK208110 | Universal stress protein                         |       |       |       |      |      | 1.55  |
| <b>Primary metabolic process</b> |          |                                                  |       |       |       |      |      |       |
| AHGTAVGLPSSDDMGnpSEVGHNALGAGR    | TC368880 | Phosphoglycerate mutase                          | 1.92  |       |       | 1.61 | 0.57 | 11.58 |
| pSFDEQSWSDLShR                   | TC451647 | Alkaline invertase                               |       |       |       |      | 2.18 |       |
| GGMpTSHAAVVAR                    | TC415232 | Orthophosphate dikinase                          |       | 50.75 |       |      |      |       |
| ATGAFILpTASHNPGGPTEDFGIK         | TC373718 | Phosphoglucomutase                               |       |       |       | 0.53 |      | 0.65  |
| DVpSEQFDEFPLAYNK                 | CA648206 | Protein kinase                                   |       |       |       |      | 1.61 |       |
| FEFEPVDPtIDK                     | TC461954 | Ribulose biphosphate carboxylase large chain     |       |       |       | 0.61 | 0.54 | 0.60  |
| IPMFGpSTDATQVINEVEEVKK           | CK215513 | Ribulose biphosphate carboxylase small chain     | 0.47  | 0.50  |       | 0.38 | 1.58 |       |
| VPGVPAASpSmGGGDSLSDpSLR          | CV763920 | Sucrose-phosphate synthase                       |       |       |       |      | 0.36 | 0.45  |
| VPGVPAASpSMGGGDSLSDpSLR          | CV763920 | Sucrose-phosphate synthase                       |       | 30.26 | 0.03  |      |      |       |
| VPGVPAASpSMGGGDSLpSDSLR          | CV763920 | Sucrose-phosphate synthase                       |       | 30.26 | 50.03 |      |      |       |
| IAAQSSDpSPR                      | TC389412 | UDP-N-acetylglucosamine pyrophosphorylase        |       |       |       | 1.64 |      |       |
| QVAHAPQELNpSPR                   | BE411978 | Asparagine synthase                              | 10.00 | 34.47 | 0.51  |      |      |       |

|                                        |          |                                               |       |       |       |       |      |       |
|----------------------------------------|----------|-----------------------------------------------|-------|-------|-------|-------|------|-------|
| VdpSEGVMcGANFK                         | TC385268 | Asparagine synthase                           |       |       |       | 1.64  |      | 0.69  |
| YTQDpSDDpSDTESHR                       | TC384837 | Eukaryotic translation initiation factor      |       |       |       |       | 0.62 | 1.50  |
| pSPTGSTTSALLQQYELHQQQVR                | TC396045 | Topoisomerase-like protein                    |       |       | 16.81 |       | 1.55 | 33.95 |
| <b>Cellular component organization</b> |          |                                               |       |       |       |       |      |       |
| TVETTADDTEGTpSK                        | TC384644 | Hyphal wall protein 1-like                    |       | 50.58 | 50.64 |       |      |       |
| EMPLPVpSPGADYMSHR                      | CA502135 | KH domain containing protein                  | 13.00 | 50.63 | 0.32  |       |      | 34.29 |
| EASNVEDpSPR                            | TC393311 | Myosin heavy chain-like                       | 0.63  | 0.68  | 0.68  |       |      |       |
| KApSPPPQSVVLHVDHLR                     | CA716965 | Ser/Arg-related nuclear matrix protein        | 13.05 | 0.51  |       | 0.51  |      |       |
| GRpSPAFNALAATFENSAR                    | CA644276 | Villin 2                                      | 0.66  |       | 1.63  | 0.60  | 0.63 |       |
| ADTDAVAGEDQGApSENEAER                  | TC448038 | Plectin-like protein                          |       |       |       |       | 1.97 |       |
| pTPTGSGYLGR                            | CK205332 | Transformer-SR ribonucleoprotein              |       |       |       |       | 0.66 | 15.39 |
| GQDPQGmpSPGPGGR                        | DR731822 | Heterogeneous nuclear ribonucleoprotein A2/B1 |       |       |       | 0.53  | 2.27 | 2.10  |
| VVPSTGMAANpSPPSR                       | TC374890 | AT-hook motif nuclear localized protein       |       |       |       |       | 1.81 |       |
| DDpSDEDDDLHER                          | CJ781661 | DNA-dependent protein kinase                  |       |       |       |       |      | 1.78  |
| NDDQEDpSVTVGGTR                        | TC398351 | Nuclear matrix constituent protein            |       |       |       | 0.64  |      | 1.66  |
| NDDQEDpSVpTVGGTR                       | TC398351 | Nuclear matrix constituent protein            |       |       |       |       |      | 1.87  |
| <b>Growth and development</b>          |          |                                               |       |       |       |       |      |       |
| SGPTGDASGFAPsVEK                       | TC418760 | IgE autoantigen-like                          | 0.50  |       | 0.40  |       |      |       |
| <b>Unknown</b>                         |          |                                               |       |       |       |       |      |       |
| pSAAGAGFLDDDDDEGDLHSHR                 | TC455092 | AGAP006340-PA                                 | 1.60  |       |       |       |      |       |
| EDSHATEIYNDHQpSDSADVQNVDR              | TC405479 | Chromosome chr1 scaffold_46                   | 1.85  | 0.50  | 0.69  |       |      |       |
| pTISESMDELTSQR                         | CD889063 | Chromosome chr1 scaffold_5                    |       |       | 0.69  |       |      |       |
| DAAAGYDpSDDANANAR                      | TC437438 | Chromosome chr14 scaffold_26                  |       |       | 50.62 |       |      |       |
| YPAHTALApTDEEEASET                     | CJ846803 | Chromosome chr17 scaffold_16                  |       |       |       |       |      | 1.56  |
| AApSADDLTLPKD                          | TC406559 | Chromosome chr18 scaffold_1                   |       |       |       | 1.52  |      |       |
| VQSGVMpTAETGTYR                        | TC384916 | Chromosome chr3 scaffold_8                    | 1.51  | 1.56  |       |       |      |       |
| FSTQLAAVGApTAR                         | TC389022 | Chromosome chr6 scaffold_3                    | 7.32  | 0.53  | 0.63  |       |      |       |
| RDDNDEpSYGMAR                          | TC405552 | Chromosome chr6 scaffold_3                    |       |       |       | 0.59  | 1.59 | 1.67  |
| RDDNDEpSYGmAR                          | TC405552 | Chromosome chr6 scaffold_3                    |       |       | 50.38 |       |      |       |
| HNVPNNDVPDESIEGPPpSDEEGEALAK           | CK154232 | Chromosome chr7 scaffold_42                   |       |       |       |       |      | 5.77  |
| SLESDAADNpSDEEDTR                      | BQ294942 | Chromosome chr7 scaffold_42                   |       |       |       | 0.39  |      | 2.10  |
| SLESDAADNpSDEEDTRR                     | BQ294942 | Chromosome chr7 scaffold_42                   |       |       | 3.54  |       |      |       |
| STLAANpSPAAR                           | TC410891 | Chromosome chr8 scaffold_68                   | 0.68  | 50.51 | 0.49  |       |      |       |
| AADSDAANVSpSPR                         | TC386795 | Chromosome chr9 scaffold_33                   | 3.24  | 50.46 |       |       |      |       |
| DHPEPDDDSpSEQETGTFK                    | CA605418 | Chromosome chr9 scaffold_7                    |       |       |       |       | 0.29 | 0.45  |
| DDHHQAAASDNPPSIPTATpSPLATTATSK         | TC383200 | Predicted protein                             |       |       |       | 4.54  | 6.78 |       |
| AAAEHWGpSPAAAAAFDADLVR                 | TC395764 | Expressed protein                             |       |       |       | 14.88 | 0.51 |       |

|                              |          |                                  |      |       |       |      |           |
|------------------------------|----------|----------------------------------|------|-------|-------|------|-----------|
| ApSLGGDDDLLAHHK              | CA610545 | Expressed protein                | 0.53 | 0.51  |       |      | 1.73      |
| VSpSPHADDEVIPEEAAEK          | CJ730168 | Gene 11-1 protein                |      | 0.51  | 0.23  | 1.55 |           |
| VVASSVESpSDAGR               | TC412973 | H0311C03.6 protein               | 3.06 | 50.47 |       |      |           |
| VVASSVESpSSDAGR              | TC412973 | H0311C03.6 protein               | 3.16 | 50.50 |       |      |           |
| HQHDVQSPDPpSPMLDK            | TC375311 | Os01g0139200 protein             |      | 33.98 |       |      |           |
| GGDpSWDEPFSSAAAAAAGGGGGR     | TC441838 | Os01g0139200 protein             |      |       |       |      | 0.34      |
| MAADHAADAEAPApSAED           | CK165439 | Os04g0103300 protein             |      |       |       |      | 0.54 1.55 |
| TLAAADDEDpTGGEENEGAQDVADR    | TC447034 | Os05g0151400 protein             |      |       |       |      | 0.27      |
| DYVAQPLPLpTPAYAEQ GK         | CN011061 | Os05g0583100 protein             | 7.24 |       |       | 1.55 | 0.53      |
| GGKPINPNDPVENPEAFSSVVAPpSPNR | TC392922 | Os08g0526400 protein             | 0.57 |       | 21.90 |      |           |
| KPAAGpSEGGGFNLGGLFAK         | BE418735 | PE-PGRS family protein           |      |       |       |      | 0.24 0.68 |
| NSIpSDDEEHDMTEDATDAQSGK      | CK161991 | Putative uncharacterized protein |      | 0.70  |       |      |           |
| SpSPDDYTGGGSYNK              | TC370657 | Putative uncharacterized protein |      |       |       | 0.46 |           |

The present ratios were calculated by TMT-127/TMT-126 for 3 dai, TMT-129/TMT-128 for 7 dai, TMT-131/TMT-130 for 11 dai from at least two biological replications. Capital letters in the peptide sequence indicate amino acids, and lower case m and c indicate oxidation of Met and carbamidomethyl Cys, respectively. Lower case p indicates phosphorylation of Ser, Thr or Tyr that follows. Peptides marked in yellow were identified in both wheat cultivars Sevin and Stakado. Accession numbers are from TaGI wheat gene index Release 12.0.
